# Supplementary material
Source: HighWire-hosted journal article supplement (https://erj.ersjournals.com/content/51/3/1701656)
Supplement: inline-supplementary-material-1 [file inline-supplementary-material-1.pdf]

## Online supplementary material

### **Impact of immunosuppression on incidence, etiology and outcome of ventilator-associated lower respiratory tract infections**

Anne-Sophie Moreau<sup>1</sup>, Ignacio Martin-Loeches<sup>2</sup>, Pedro Pova<sup>3,4</sup>, Jorge Salluh<sup>5</sup>, Alejandro Rodriguez<sup>6</sup>, Arnaud W Thille<sup>7</sup>, Emilio Diaz Santos<sup>8</sup>, Elisa Vedes<sup>9</sup>, Suzana Margareth Lobo<sup>10</sup>, Bruno Mégarbane<sup>11</sup>, Esperanza Molero Silvero<sup>12</sup>, Luis Coelho<sup>3,4</sup>, Laurent Argaud<sup>13</sup>, Rafael Sanchez Iniesta<sup>14</sup>, Julien Labreuche<sup>15</sup>, Anahita Rouzé<sup>1</sup>, Saad Nseir<sup>1,16</sup> for the TAVeM study Group

## RESULTS

Main reasons for ICU admission are presented in Table S1.

### Diagnostic procedure

In IC patients, the percentage of endotracheal aspirate and bronchoalveolar lavage was significantly higher in VAP than in VAT patients. In non-IC patients, although the percentage of endotracheal aspirate was significantly lower in VAP than in VAT patients; the percentage of bronchoscopy, bronchoalveolar lavage, mini bronchoalveolar lavage, and blood cultures were significantly higher in VAP than in VAT patients (Table S2).

### Microorganisms

Although the percentage of patients with VA-LRTI related to MDR, *Enterobacter* spp., and MRSA was significantly higher in IC patients than in non-IC patients; the percentage of patients with VA-LRTI related to MSSA was significantly lower in IC patients than in non-IC patients (Table S3).

In the VAT subgroup, the only difference between IC patients and non-IC patients was a higher incidence of *Enterobacter* spp. in IC patients than in non-IC patients (19.2 versus 9.3%,  $p=0.05$ ). However, in the VAP subgroup, the incidence of MRSA and *Enterobacter* spp. was significantly higher in IC patients than in non-IC patients (6.3% versus 1.3 %,  $p=0.033$ ; 21.9% versus 10.5%,  $p=0.02$ ; respectively); whereas MSSA incidence was significantly lower in IC patients than in non-IC patients (3.1% versus 25.6%,  $p<0.001$ ).

### Risk factors for ICU-mortality in patients with VA-LRTI by univariate analysis

At ICU admission, age, SAPS II, SOFA, immunosuppression, and admission category were significantly associated with higher ICU-mortality rate in these patients. At VA-LRTI diagnosis,

SOFA score, MDR, were associated with increased ICU-mortality. Appropriate antibiotic treatment was associated with significantly lower ICU-mortality rate (Table S4).

**Table S1. Main reasons for ICU admission**

|                                            | Immunosuppression |            |        |
|--------------------------------------------|-------------------|------------|--------|
|                                            | Yes               | No         | p      |
|                                            | n = 663           | n = 2297   |        |
| <b>Acute respiratory distress syndrome</b> | 99 (4.3)          | 48 (7.2)   | 0.01   |
| <b>Acute exacerbation of COPD</b>          | 110 (4.8)         | 13 (2)     | <0.001 |
| <b>Pneumonia</b>                           | 282 (12.3)        | 136 (20.5) | <0.001 |
| <b>Aspiration</b>                          | 40 (1.7)          | 9 (1.4)    | 0.60   |
| <b>Pulmonary embolism</b>                  | 14 (0.6)          | 7 (0.1)    | 0.29   |
| <b>Pleural effusion</b>                    | 4 (0.2)           | 5 (0.8)    | 0.03   |
| <b>Pneumothorax</b>                        | 8 (0.3)           | 3 (0.5)    | 0.72   |
| <b>Hemothorax</b>                          | 15 (0.7)          | 3 (0.5)    | 0.78   |
| <b>Sepsis</b>                              | 226 (9.8)         | 112 (17)   | 0.001  |
| <b>Shock</b>                               | 198 (8.6)         | 71 (11)    | 0.07   |
| <b>Agina pectoris</b>                      | 11 (0.5)          | 2 (0.3)    | 0.74   |
| <b>Abdominal aortic aneurysm</b>           | 12 (0.5)          | 2 (0.3)    | 0.74   |
| <b>Cardiomyopathy</b>                      | 25 (1.1)          | 4 (0.6)    | 0.37   |
| <b>Congestive heart failure</b>            | 84 (3.6)          | 12 (1.8)   | 0.02   |
| <b>Arrhythmia</b>                          | 30 (1.3)          | 4 (0,6)    | 0.15   |
| <b>Myocardial inafrcion</b>                | 63 (2.7)          | 6 (0.9)    | 0.01   |
| <b>Rupture of esophageal varices</b>       | 9 (0.4)           | 0 (0)      | 0.22   |
| <b>Gastrointestinal bleeding</b>           | 29 (1.3)          | 4 (0.6)    | 0.21   |
| <b>Liver failure</b>                       | 30 (1.3)          | 4 (0.6)    | 0.15   |
| <b>Pancreatitis</b>                        | 34 (1.5)          | 2 (0.3)    | 0.01   |
| <b>Acute renal failure</b>                 | 32 (1.4)          | 13 (2)     | 0.28   |
| <b>Overdose</b>                            | 29 (1.3)          | 1 (0.2)    | 0.01   |

|                                  |            |            |        |
|----------------------------------|------------|------------|--------|
| <b>Seizure</b>                   | 56 (2.4)   | 15 (2,3)   | 0.89   |
| <b>Coma</b>                      | 232 (10.1) | 44 (6.6)   | 0.01   |
| <b>Empyema</b>                   | 2 (0.1)    | 0 (0)      | 1.00   |
| <b>Stroke</b>                    | 110 (4.8)  | 11 (1.6)   | <0.001 |
| <b>Brain aneurysm</b>            | 37 (1.6)   | 5 (0.8)    | 0.13   |
| <b>Brain death</b>               | 5 (0.2)    | 2 (0.3)    | 0.66   |
| <b>Transient ischemic attack</b> | 2 (0.1)    | 0 (0)      | 1,00   |
| <b>Traumatic brain injury</b>    | 155 (6.7)  | 4 (0.6)    | <0.001 |
| <b>Other</b>                     | 262 (11.4) | 101 (15.2) | 0.01   |

COPD, chronic obstructive pulmonary disease

**Table S2. Diagnostic procedures in patients with ventilator-associated lower respiratory tract infections.**

|                                                    | Immunosuppression |               |        |                |                |         |
|----------------------------------------------------|-------------------|---------------|--------|----------------|----------------|---------|
|                                                    | Yes<br>n = 116    |               |        | No<br>n = 573  |                |         |
|                                                    | VAT<br>n = 64     | VAP<br>n = 52 | p      | VAT<br>n = 268 | VAP<br>n = 305 | p       |
| Endotracheal aspirate                              | 43 (67)           | 42 (81)       | 0.039* | 235 (88)       | 211 (69)       | <0.001* |
| Blind protected specimen brush                     | 5 (8)             | 11 (21)       | 0.29   | 27 (10)        | 40 (13)        | 0.3     |
| Bronchoscopy                                       | 3 (5)             | 11 (21)       | 0.085  | 17 (6)         | 45 (15)        | 0.001*  |
| Bronchoalveolar lavage                             | 4 (6)             | 14 (27)       | 0.042* | 11 (4)         | 45 (15)        | <0.001* |
| Mini bronchoalveolar lavage                        | 3 (5)             | 5 (10)        | 0.73   | 14 (5)         | 40 (13)        | 0.001*  |
| Blood cultures                                     | 31 (48)           | 45 (87)       | 0.25   | 155 (58)       | 230 (75)       | <0.001* |
| Tested for <i>Streptococcus pneumoniae</i> antigen | 2 (3)             | 6 (12)        | 0.29   | 12 (4)         | 10 (3)         | 0.46    |
| Tested for <i>Legionella pneumophila</i> antigen   | 3 (5)             | 7 (13)        | 0.51   | 11 (4)         | 14 (5)         | 0.78    |

Data are numbers (%)

IC, immunocompromised; VAT, ventilator-associated tracheobronchitis; VAP, ventilator-associated pneumonia

\* OR (95% CI): 2.5 (1.03-6.1); 3.17 (2.04-4.91); 0.39 (0.22-0.70); 0.3 (0.09-0.97); 0.28 (0.13-0.49); 0.37 (0.19-0.69); 0.45 (0.31-0.64); respectively

**Table S3. Microorganisms in patients with ventilator-associated lower respiratory tract infections**

|                                            | Immunosuppression |               | P       |
|--------------------------------------------|-------------------|---------------|---------|
|                                            | Yes<br>n = 116    | No<br>n = 573 |         |
| <b>Polymicrobial</b>                       | 25 (22)           | 114 (20)      | 0.7     |
| <b>MDR</b>                                 | 83 (72)           | 338 (59)      | 0.011*  |
| <b>Gram-negative bacilli</b>               | 117               | 509           |         |
| <b><i>Pseudomonas aeruginosa</i></b>       | 33 (28)           | 135 (24)      | 0.26    |
| <b><i>Enterobacter</i> sp.</b>             | 24 (21)           | 57 (10)       | 0.001*  |
| <b><i>Klebsiella</i> sp.</b>               | 16 (14)           | 85 (15)       | 0.77    |
| <b><i>Escherichia coli</i></b>             | 16 (14)           | 61 (11)       | 0.33    |
| <b><i>Stenotrophomonas maltophilia</i></b> | 7 (6)             | 24 (4)        | 0.38    |
| <b><i>Acinetobacter baumannii</i></b>      | 7 (6)             | 34 (6)        | 0.97    |
| <b><i>Serratia marcescens</i></b>          | 3 (3)             | 25 (4)        | 0.37    |
| <b><i>Proteus mirabilis</i></b>            | 4 (3)             | 25 (4)        | 0.66    |
| <b><i>Hemophilus influenzae</i></b>        | 5 (4)             | 52 (9)        | 0.089   |
| <b><i>Citrobacter freundii</i></b>         | 2 (2)             | 11 (2)        | 0.89    |
| <b>Gram-positive Cocci</b>                 | 24                | 178 (31)      |         |
| <b><i>Streptococcus pneumoniae</i></b>     | 8 (7)             | 32 (6)        | 0.58    |
| <b>MSSA</b>                                | 10 (9)            | 136 (24)      | <0.001* |
| <b>MRSA</b>                                | 6 (5)             | 10 (2)        | 0.025*  |

Data are numbers (%)

MDR, multidrug-resistant bacteria; MSSA, methicillin-sensitive *Staphylococcus aureus*; MRSA, methicillin-resistant *Staphylococcus aureus*

\*OR (95% CI): 1.75 (1.13-2.71); 2.36 (1.4-4); 0.3 (0.15-0.6); 3.1 (1.1-8.62)

**Table S4. Risk factors for ICU mortality in patients with ventilator-associated lower respiratory tract infection by univariate analysis.**

|                                  | Survivors<br>n = 450 | Nonsurvivors<br>n = 239 | P      |
|----------------------------------|----------------------|-------------------------|--------|
| <b>At ICU admission</b>          |                      |                         |        |
| Age                              | 59 (44, 71)          | 66 (57, 77)             | <0.001 |
| Male gender                      | 306                  | 157                     | 0.54   |
| SAPS II                          | 45 (34, 58)          | 54 (42, 65)             | <0.001 |
| SOFA                             | 7 (5, 10)            | 8 (6, 11)               | 0.002  |
| Immunosuppression                | 53                   | 63                      | <0.001 |
| ARDS                             | 36                   | 28                      | 0.11   |
| Category of admission            |                      |                         | <0.001 |
| Medical                          | 233                  | 160                     |        |
| Surgical                         | 66                   | 35                      |        |
| Trauma                           | 151                  | 44                      |        |
| <b>At VA-LRTI diagnosis</b>      |                      |                         |        |
| SOFA                             | 6 (4, 8)             | 9 (6, 11)               | <0.001 |
| Appropriate antibiotic treatment | 400                  | 194                     | 0.005* |
| Multidrug resistant bacteria     | 256                  | 165                     | 0.001* |

Data are numbers (%) or median (interquartile range)

ICU, intensive care medicine; SAPS, simplified acute physiology score; SOFA, sequential organ failure assessment; ARDS, acute respiratory distress syndrome; VA-LRTI, ventilator-associated lower respiratory tract infection

\*OR (95% CI): 0.54 (0.39-0.86), 1.72 (1.23-2.4)
